# Supplementary material for: Antioxidant defense system in the prefrontal cortex of chronically stressed rats treated with lithium
Source: PeerJ. 2022 Mar 23;10:e13020. doi: 10.7717/peerj.13020 (PMC8957266; doi:10.7717/peerj.13020)
Supplement: Supplemental Information 1 [file peerj-10-13020-s001.xlsx]

## Sheet: mRNA
0.68	0.72		1.13	0.93		0.54	0.55		0.68	0.78
0.79	0.81		1.29	1.17		0.61	0.6		0.81	0.79
1.03	0.92		1.44	1.13		0.76	0.71		1.03	0.99
0.79	0.88		1.25	1		0.79	0.82		0.89	1.07
0.61	0.65		1.19	1.17		0.56	0.55		0.71	0.75
0.7	0.67		1.34	0.98		0.7	0.67		0.79	0.77
0.61	0.61		1.29	1.05		0.51	0.59		0.71	0.61
0.72	0.75		0.9	0.81		0.72	0.47		0.9	0.67
0.59	0.66		1.37	1.34		0.49	0.63		0.7	0.86
0.92	1.02		1.34	1.24		0.74	0.89		1.02	1.08
CRS	CRS+Li		CRS	CRS+Li		CRS	CRS+Li		CRS	CRS+Li
SOD1	SOD1		SOD2	SOD2		CAT	CAT		GPx	GPx
Normality	Passed		Normality	Passed		Normality	Passed		Normality	Passed
Test:	(P = 0.235)		Test:	(P = 0.348)		Test:	(P = 0.687)		Test:	(P = 0.349)

## Sheet: protein
0.40717	0.36708		0.99041	0.70019		0.45552	0.4593		0.59855	0.58842
0.4283	0.40928		0.93508	0.70517		0.46507	0.43515		0.59481	0.59247
0.44375	0.40001		0.93914	0.71123		0.4703	0.46159		0.60635	0.58521
0.42722	0.42272		0.97737	0.73979		0.47763	0.47244		0.60414	0.59419
0.41994	0.40934		0.99357	0.73534		0.4758	0.45341		0.59861	0.58817
0.41052	0.43727		0.95452	0.6995		0.47032	0.45543		0.59823	0.58103
0.44276	0.44015		0.98459	0.75556		0.46149	0.47366		0.5987	0.60317
0.41543	0.4126		0.94675	0.7618		0.44979	0.46893		0.57858	0.59906
0.39446	0.3732		0.97999	0.74404		0.45415	0.46263		0.576	0.57355
0.47419	0.36086		0.93102	0.73925		0.45642	0.43527		0.57109	0.57516
CRS	CRS+Li		CRS	CRS+Li		CRS	CRS+Li		CRS	CRS+Li
SOD1	SOD1		SOD2	SOD2		CAT	CAT		GPx	GPx
Normality	Passed		Normality	Passed		Normality	Passed		Normality	Passed
Test:	(P = 0.862)		Test:	(P = 0.169)		Test:	(P = 0.784)		Test:	(P = 0.234)

## Sheet: activity
6.36	4.2		1.39	0.59		1.782	1.68		18.93	22.7
5.12	3.98		1	0.3		1.9	1.8		19	21.4
5.98	3.5		1.5	0.7		2.1	1.89		24.5	30
5.95	4.52		1.2	0.6		2.2	2.18		17	19
7.24	5.14		1.37	0.61		2	1.89		21.7	24.6
6.36	4.2		1.6	0.8		2.3	2.2		20	22.3
7.5	5.08		1.4	0.7		2.3	1.5		23.1	29
5.98	3.96		1.1	0.43		2.2	2.3		16	18
6.36	4.84		1.56	0.75		2.26	1.95		20	23.9
6.48	4.2		1.55	0.74		2.21	2.1		23.7	25.3
CRS	CRS+Li		CRS	CRS+Li		CRS	CRS+Li		CRS	CRS+Li
SOD1	SOD1		SOD2	SOD2		CAT	CAT		GPx	GPx
Normality	Passed		Normality	Passed		Normality	Passed		Normality	Passed
Test:	(P = 0.246)		Test:	(P = 0.088)		Test:	(P = 0.417)		Test:	(P = 0.795)
